# Supplementary material
Source: PubMed Central journal article supplement (PMC3042798)
Supplement: NIHMS269335-supplement-Supplementary_Information.pdf [file NIHMS269335-supplement-Supplementary_Information.pdf]

Figure S2a

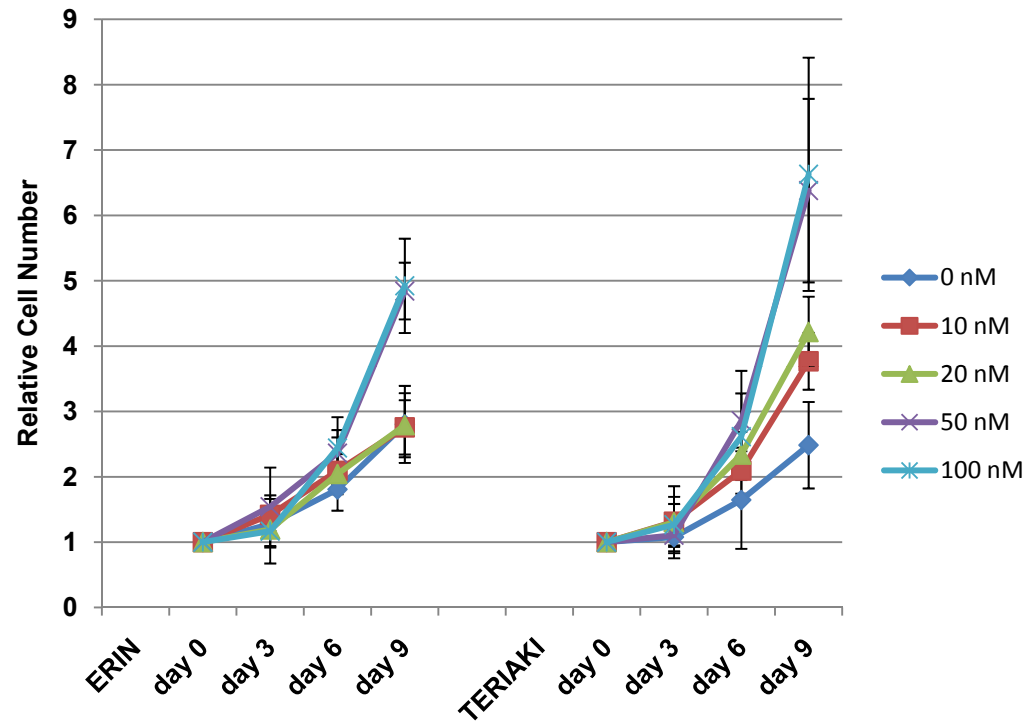

Figure S2b

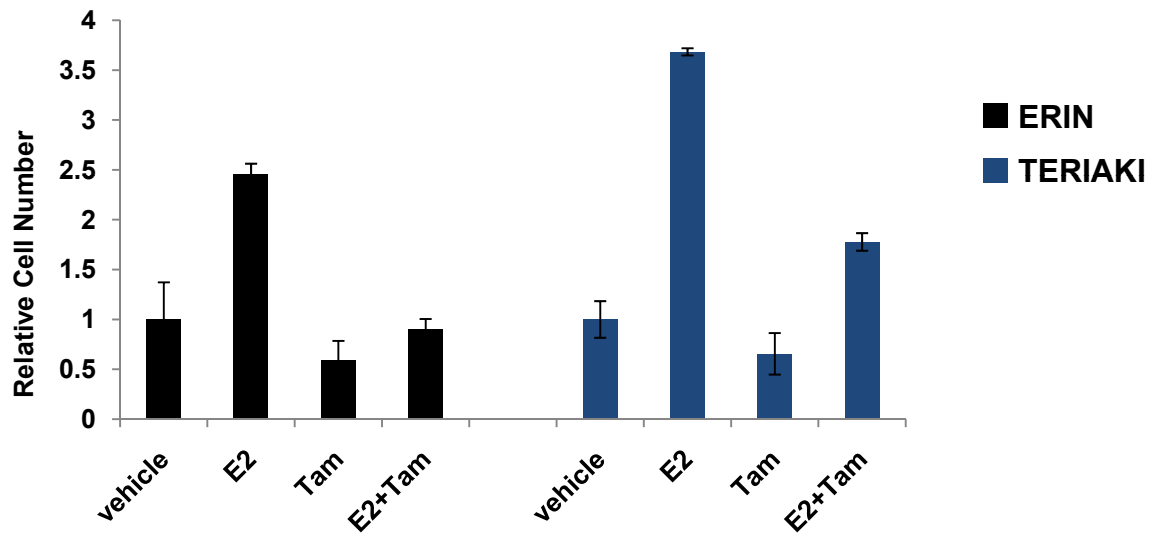

## Supplementary Figure Legends

**Figure S1. AKT1 and PIK3CA mutants differentially phosphorylate the direct Akt target GSK3 $\beta$ .** Immunoblot analysis of parental MCF10A cells and their isogenic AKT1 and PIK3CA knock in derivatives under EGF-free conditions. Phosphorylation of Akt S473 is shown to demonstrate biochemical activation of Akt under these growth conditions.

**Figure S2. AKT1 mutation does not quantitatively alter the proliferative response to estrogen and tamoxifen.** (a) Dose-response of estrogen-induced proliferation. ERIN and TERIAKI cells were seeded in EGF-free, phenol red-free growth medium supplemented with vehicle or 17  $\beta$ -estradiol (E2) at the indicated concentrations. Media was replaced every 3 days and cells were counted over a period of nine days. (b) Proliferative response to estrogen and tamoxifen. ERIN and TERIAKI cells were seeded in EGF-free, phenol red-free growth medium supplemented with vehicle, 17  $\beta$ -estradiol (E2), 4-hydroxy-tamoxifen (Tam), or both. Medium was replaced every 3 days. Cells were counted after 9 days in culture. Results are averages of triplicate cell counts with standard deviations, normalized to vehicle-treated cell counts.
